# Supplementary material for: Charge-tunable indium–organic frameworks built from cationic, anionic, and neutral building blocks
Source: Royal Society of Chemistry journal article supplement (doi:10.1039/c5dt02861b), 2015-01-01
Supplement: c5dt02861b1.pdf [file c5dt02861b1.pdf]

## Supporting Information

**Synthesis of Compound-1:** A mixture of 2,5-furandicarboxylic acid (0.03g),  $\text{In}(\text{NO}_3)_3 \cdot x\text{H}_2\text{O}$  (0.03g), 2-(2-aminoethylamino)ethanol (0.01g), concentrated nitric acid (0.02g), dimethylacetamide (1.02g) and methanol (4.10g) was stirred in a 23ml vial for 25 minutes and then heated at 120 °C for 3 days. After cooled to room temperature and washed by methanol, brown crystals were obtained.

**Synthesis of Compound-2:** A mixture of 2,5-furandicarboxylic acid (0.03g),  $\text{In}(\text{NO}_3)_3 \cdot x\text{H}_2\text{O}$  (0.015g), 2-(2-aminoethylamino)ethanol (0.01g), concentrated nitric acid (0.02g), dimethylacetamide (4.01g) and methanol (1.02g) was stirred in a 23ml vial for 25 minutes and then heated at 120 °C for 3 days. After cooled to room temperature and washed by methanol, brown crystals were obtained.

**Synthesis of Compound-3:** A mixture of 2,5-furandicarboxylic acid (0.015g),  $\text{In}(\text{NO}_3)_3 \cdot x\text{H}_2\text{O}$  (0.03g), 3-amino-5-mercapto-1,2,4-triazole (0.012g), tetramethylurea (1.08g) and water (4.01g) was stirred in a 23ml vial for 25 minutes and then heated at 80 °C for 3 days. After cooled to room temperature and washed by water, clear crystals were obtained.

### Measurements:

**Powder X-ray diffraction:** The experiments were performed on a Bruker D8 Advance X-ray powder diffractometer operating at 40 kV and 40 mA ( $\text{CuK}\alpha$  radiation,  $\lambda = 1.5418 \text{ \AA}$ ). The simulated powder XRD pattern was obtained based on the single-crystal data.

**Single crystal X-ray diffraction:** The measurements were performed on a Bruker APEX II diffractometer with nitrogen-flow temperature controller using graphite-monochromated  $\text{MoK}\alpha$  radiation ( $\lambda = 0.71073 \text{ \AA}$ ), operating in the  $\omega$  and  $\varphi$  scan mode.

**Thermal analysis:** The thermogravimetric analysis (TGA) was performed on a TA Instruments TGA Q500 apparatus in the temperature range of 30 °C to 800 °C under  $\text{N}_2$  flow at a heating rate of 5 °C/min.

**Gas adsorption measurement:** The measurements were performed on a Micromeritics ASAP 2020 surface-area and pore-size analyzer.

**Table S1.** Crystal Data and Structure Refinements for the In-MOFs in this study

| Compound reference                          | Compound-1                            | Compound-2                          | Compound-3            |
|---------------------------------------------|---------------------------------------|-------------------------------------|-----------------------|
| Chemical formula                            | $C_{18}H_{12}In_3O_{19} \cdot (NO_3)$ | $C_{12}H_4InO_{10} \cdot (C_2H_8N)$ | $C_{12}H_8In_2O_{13}$ |
| Formula Mass                                | 938.70                                | 469.70                              | 589.79                |
| Crystal system                              | Rhombohedral                          | Tetragonal                          | Monoclinic            |
| $a/?$                                       | 13.9508(19)                           | 9.7460(4)                           | 10.7435(6)            |
| $b/?$                                       | 13.9508(19)                           | 9.7460(4)                           | 21.4819(12)           |
| $c/?$                                       | 22.402(7)                             | 31.081(2)                           | 10.7721(7)            |
| $\alpha/^\circ$                             | 90.00                                 | 90.00                               | 90.00                 |
| $\beta/^\circ$                              | 90.00                                 | 90.00                               | 105.1130(10)          |
| $\gamma/^\circ$                             | 120.00                                | 90.00                               | 90.00                 |
| Unit cell volume/ $^3$                      | 3775.9(14)                            | 2952.2(3)                           | 2400.1(2)             |
| Temperature/K                               | 195(2)                                | 195(2)                              | 195(2)                |
| Space group                                 | $R\bar{3}2$                           | $I4(1)/amd$                         | $P2(1)/m$             |
| No. of formula units per unit cell, $Z$     | 3                                     | 4                                   | 4                     |
| No. of reflections measured                 | 7331                                  | 6628                                | 8139                  |
| No. of independent reflections              | 1277                                  | 725                                 | 4274                  |
| $R_{int}$                                   | 0.0502                                | 0.0276                              | 0.0252                |
| Final $R_I$ values ( $I > 2\sigma(I)$ )     | 0.0571                                | 0.0445                              | 0.0279                |
| Final $wR(F^2)$ values ( $I > 2\sigma(I)$ ) | 0.1850                                | 0.1263                              | 0.0774                |
| Final $R_I$ values (all data)               | 0.0579                                | 0.0461                              | 0.0376                |
| Final $wR(F^2)$ values (all data)           | 0.1863                                | 0.1285                              | 0.0804                |
| Goodness of fit on $F^2$                    | 1.035                                 | 1.040                               | 1.036                 |

$$R_I = \frac{\sum ||F_o| - |F_c||}{\sum |F_o|}, wR = \left\{ \frac{\sum w[(F_o)^2 - (F_c)^2]^2}{\sum w[(F_o)^2]^2} \right\}^{1/2}.$$

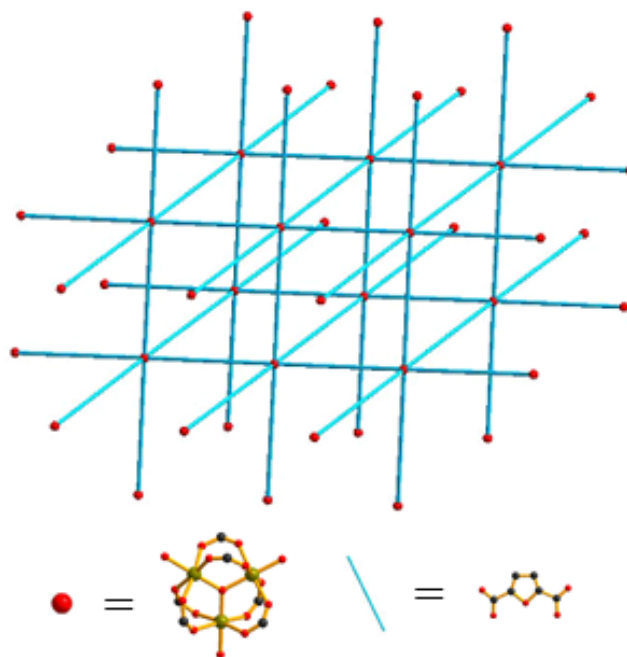**Figure S1.** The pcu network formed by indium trimers and FDA.

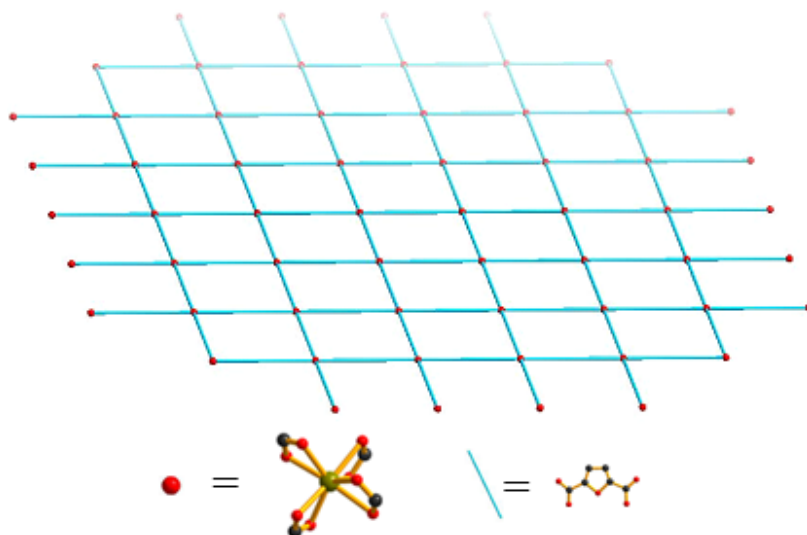

**Figure S2.** The 2D network formed by indium monomers and FDA.

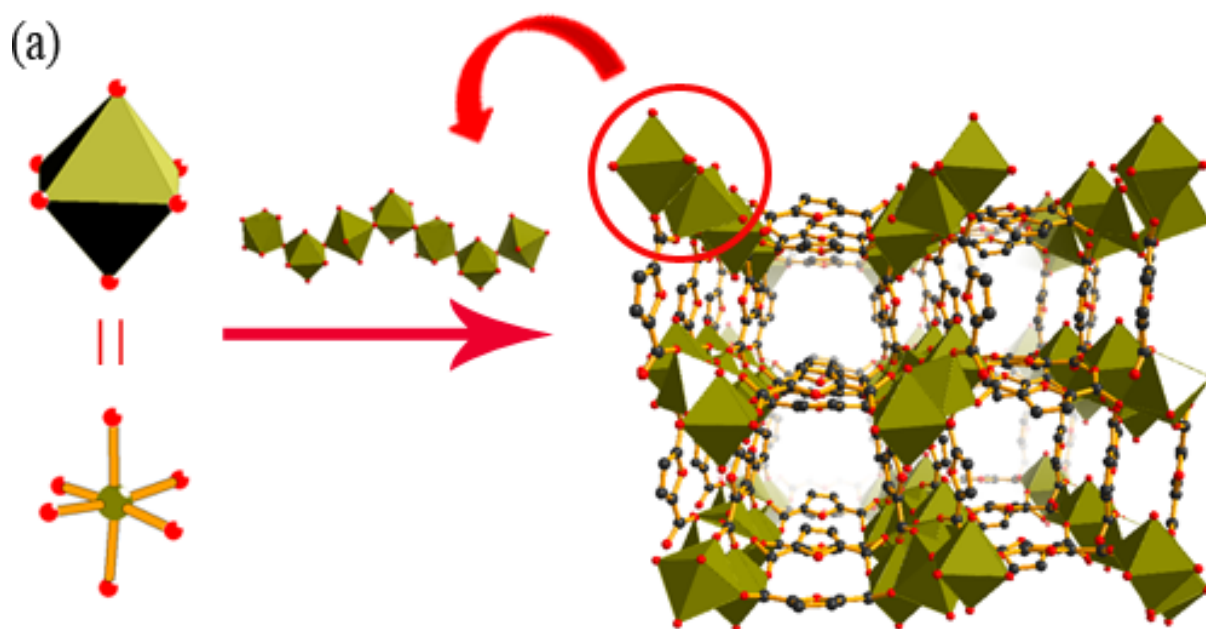

(b)

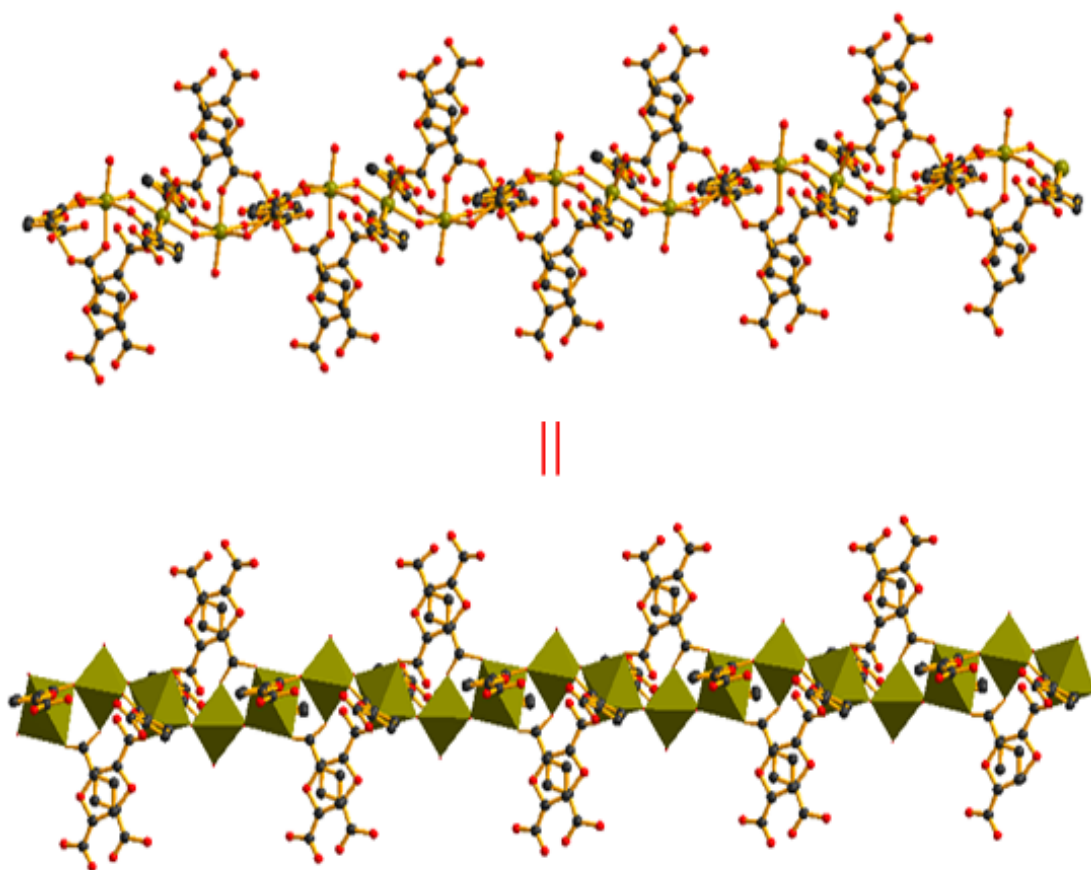

(c)

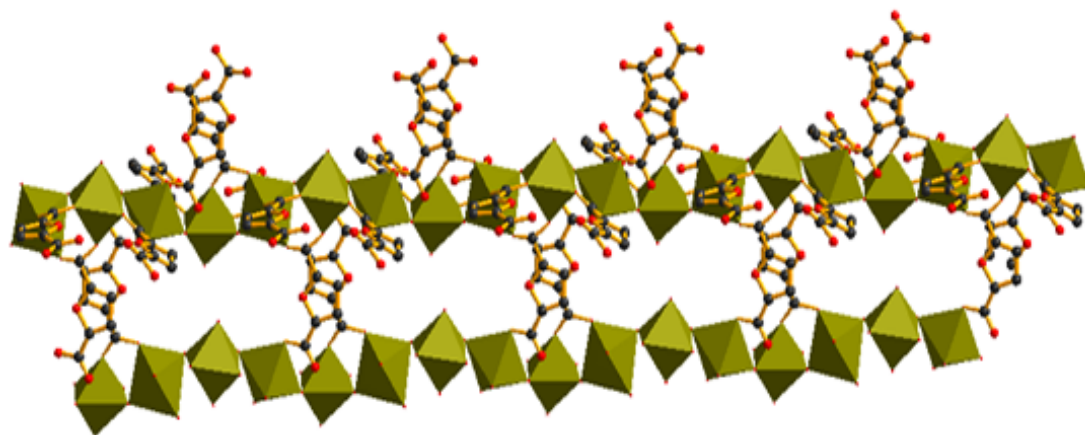

**Figure S3.** (a) 3D framework, Compound-3, formed by octahedrally coordinated indiums; (b) The construction of chain by octahedrally coordinated indiums in Compound-3; (c) The connection between two chains.

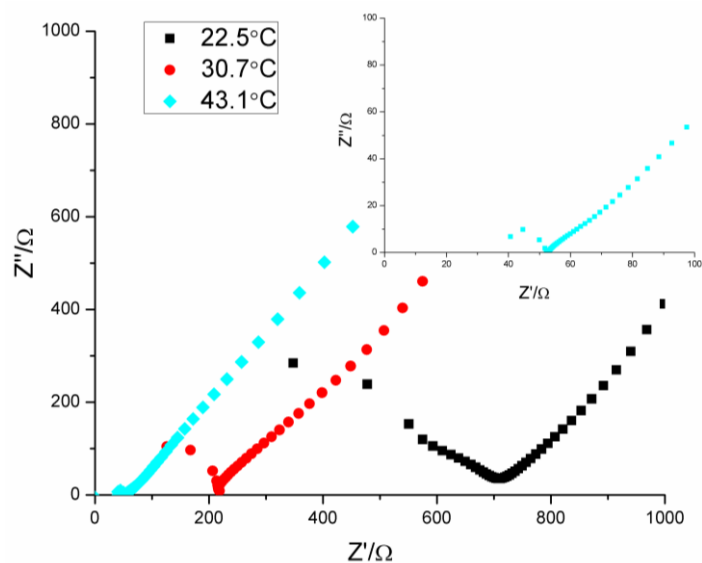

**Figure S4.** Nyquist plots of the pellet sample Compound-1 at various temperatures and 99.5% RH condition,  $S=1.327\text{cm}^2$ ,  $L=0.097\text{cm}$ . The inset shows Nyquist plot of the pellet sample Compound-1 at 43.1 °C and 99.5% RH condition.

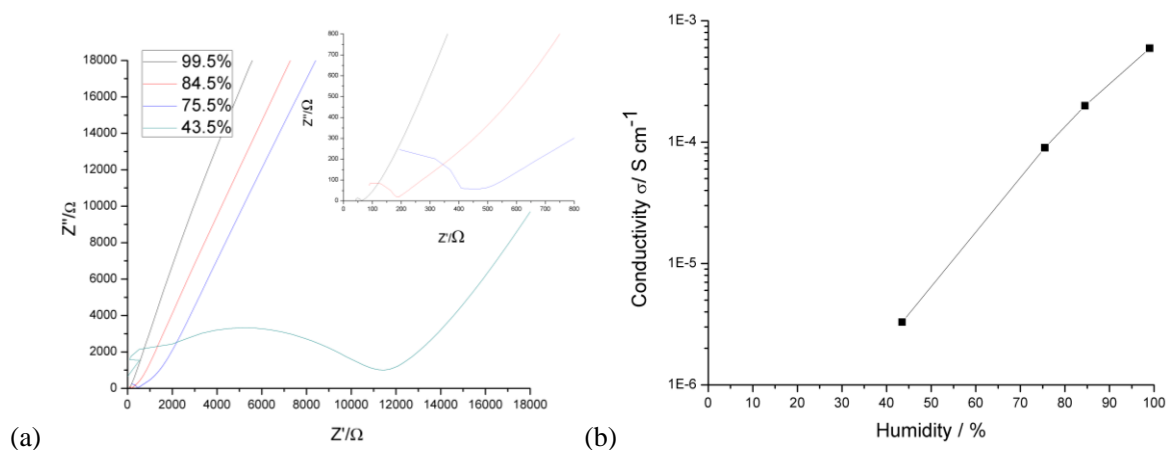

**Figure S5.** (a) Nyquist plots of the pellet sample Compound-1 at 22.5°C and various RH condition,  $S=1.327\text{cm}^2$ ,  $L=0.050\text{cm}$ . The inset shows Nyquist plots of Compound-1 at 22.5°C and 43.5% RH, 75.5% RH and 84.5% RH; (b) Humidity dependence of conductivity at 25 °C for the pellet sample Compound-1.

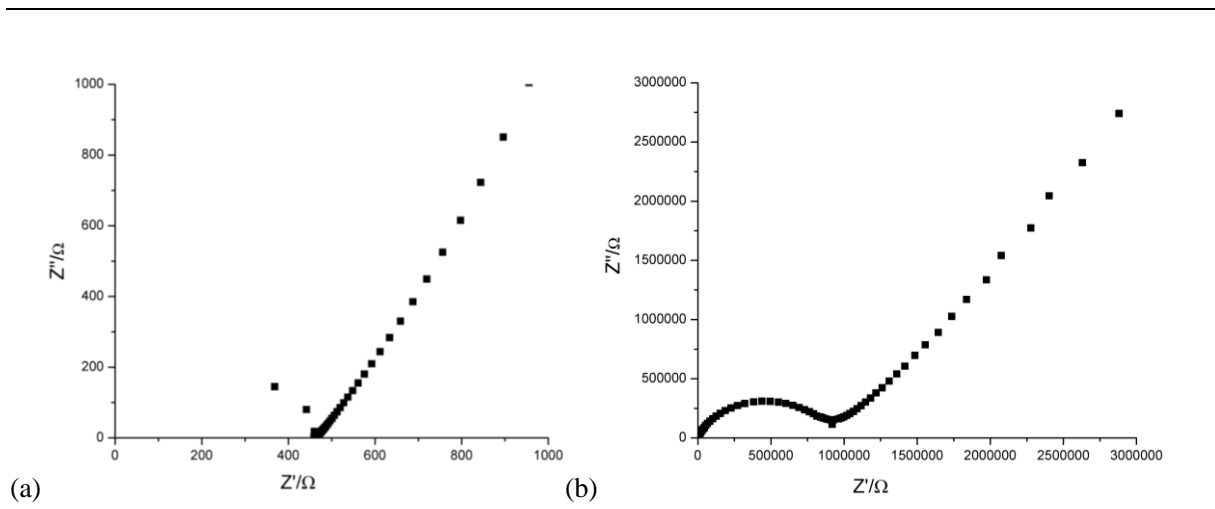

**Figure S6.** Nyquist plots of the pellet sample Compound-2 at 22.5°C and 99.5% RH (a) and 84.5% RH (b),  $S=1.327\text{cm}^2$ ,  $L=0.114\text{cm}$ .

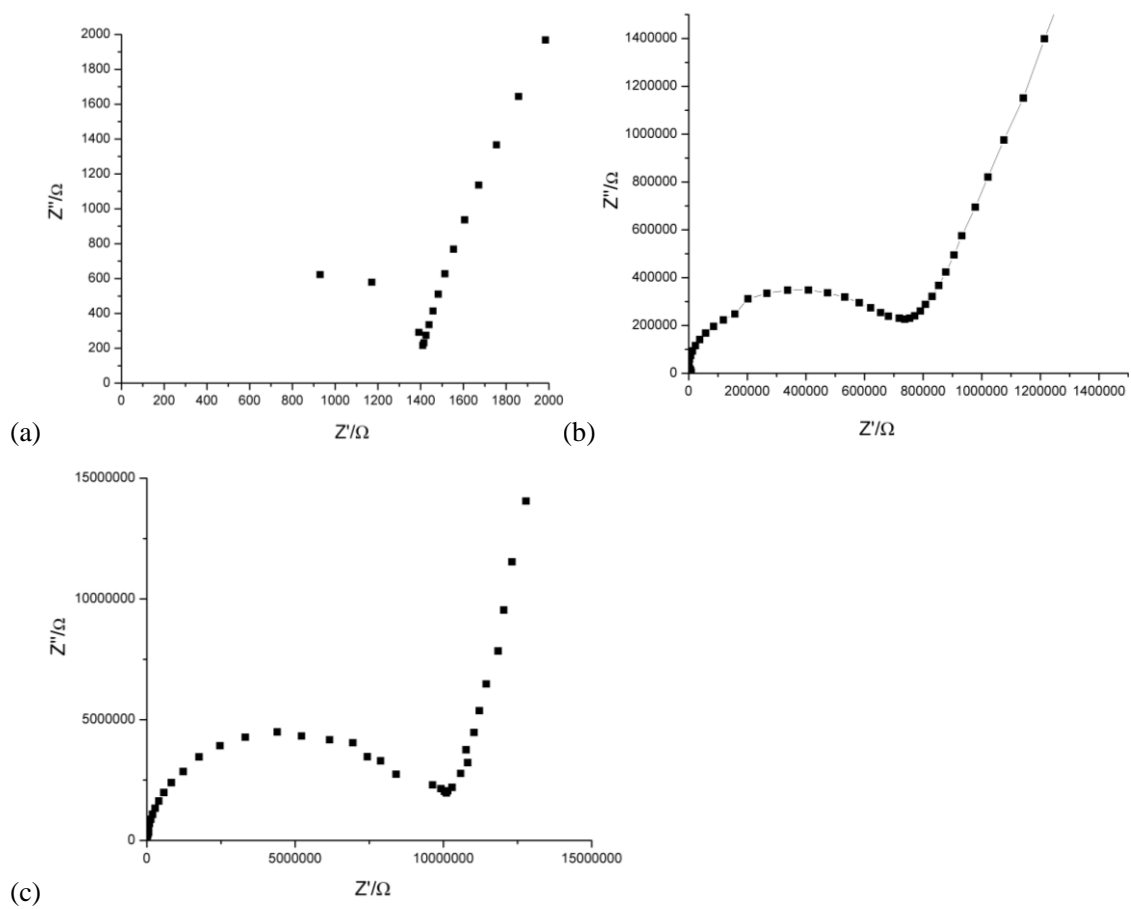

**Figure S7.** Nyquist plots of the single crystal sample Compound-2 at 22.5°C and 99.5% RH (a), 84.5% RH (b) and 75.5% RH (c),  $S=4.57 \times 10^{-5}\text{cm}^2$ ,  $L=0.0099\text{cm}$ .

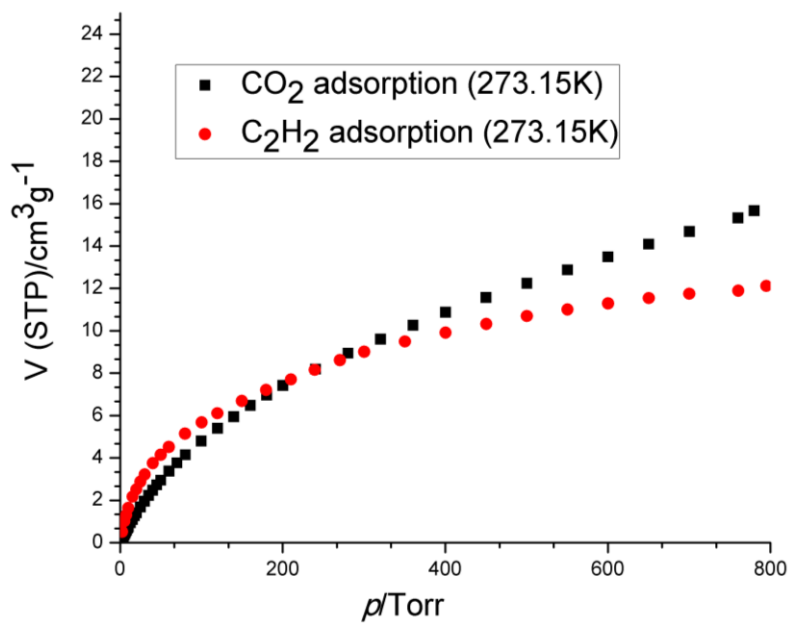

**Figure S8.** CO<sub>2</sub> and C<sub>2</sub>H<sub>2</sub> adsorption isotherms of Compound-1.

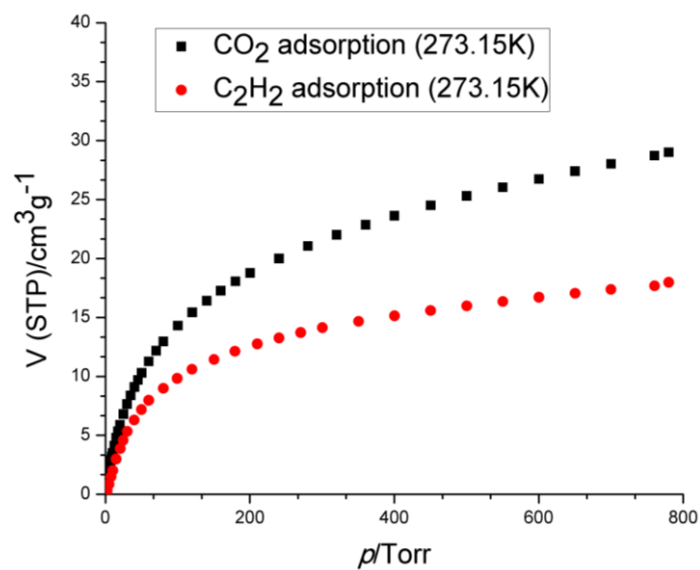

**Figure S16.** CO<sub>2</sub> and C<sub>2</sub>H<sub>2</sub> adsorption isotherms of Compound-3.
